# Supplementary material for: A Targeted Catalytic Nanobody (T-CAN) with Asparaginolytic Activity
Source: MDPI journal article supplement (doi:10.3390/cancers13225637), 2021-11-11
Supplement: s1 [file s1]

## Supplementary materials: A Targeted Catalytic Nanobody (T-CAN) with Asparaginolytic Activity

Maristella Maggi, Greta Pessino, Isabella Guardamagna, Leonardo Lonati, Cristina Pulimeno and Claudia Scotti

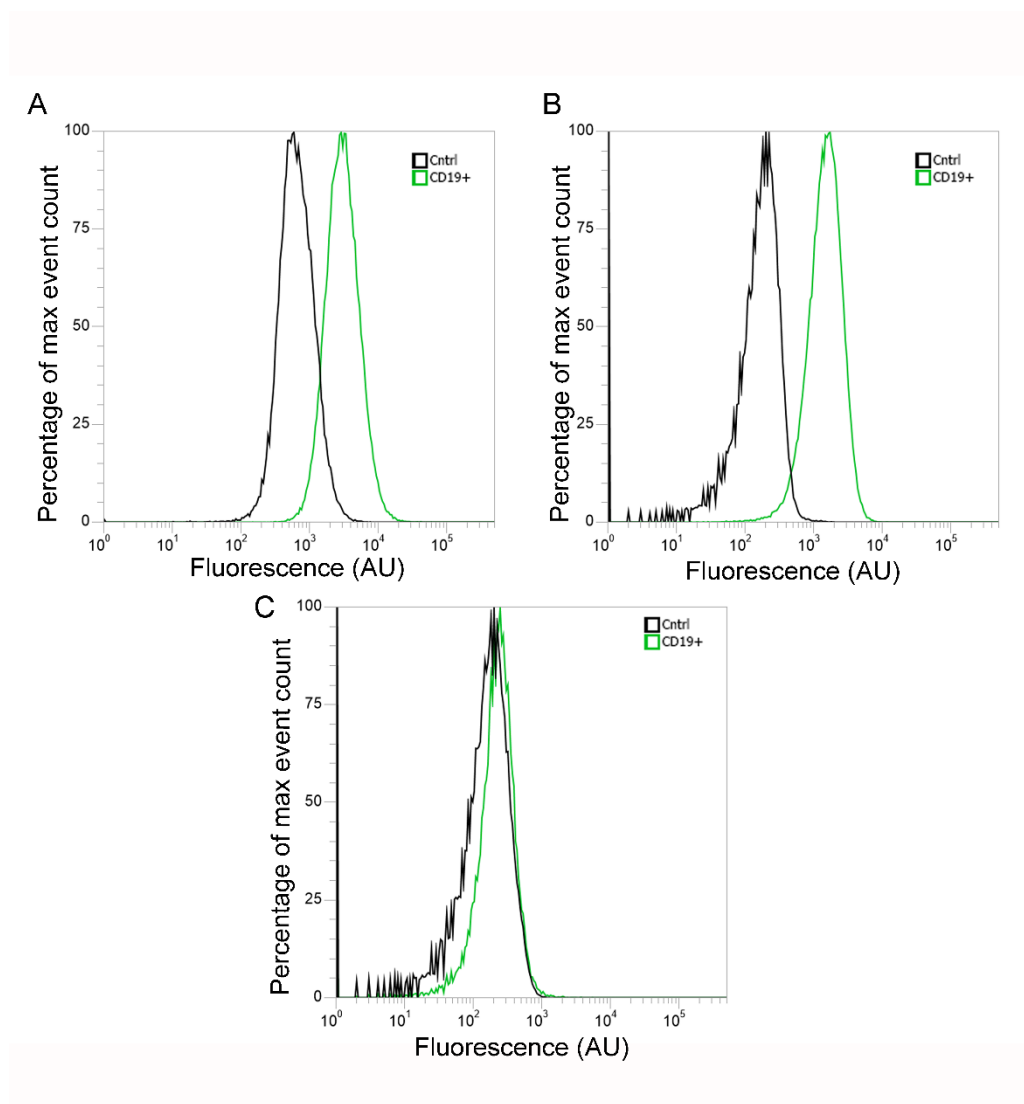

**Figure S1.** CD19 immunostaining. RAJI, REH and MOLT-4 cells were analyzed by flow cytometry for the expression levels of the surface marker CD19. In black: profile of control cells, in green:

profile of cells stained with an anti-CD19 antibody.

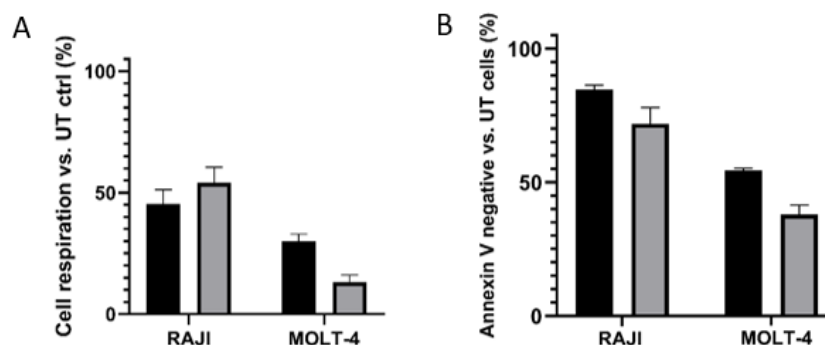

**Figure S2.** (A) and (B) MTT and Annexin V assays, respectively, performed on both RAJI and MOLT-4 cells with T-CAN (black bars) and Kidrolase (grey bars) at 0.15 U/ml. Values represents percentages versus untreated (UT) control.

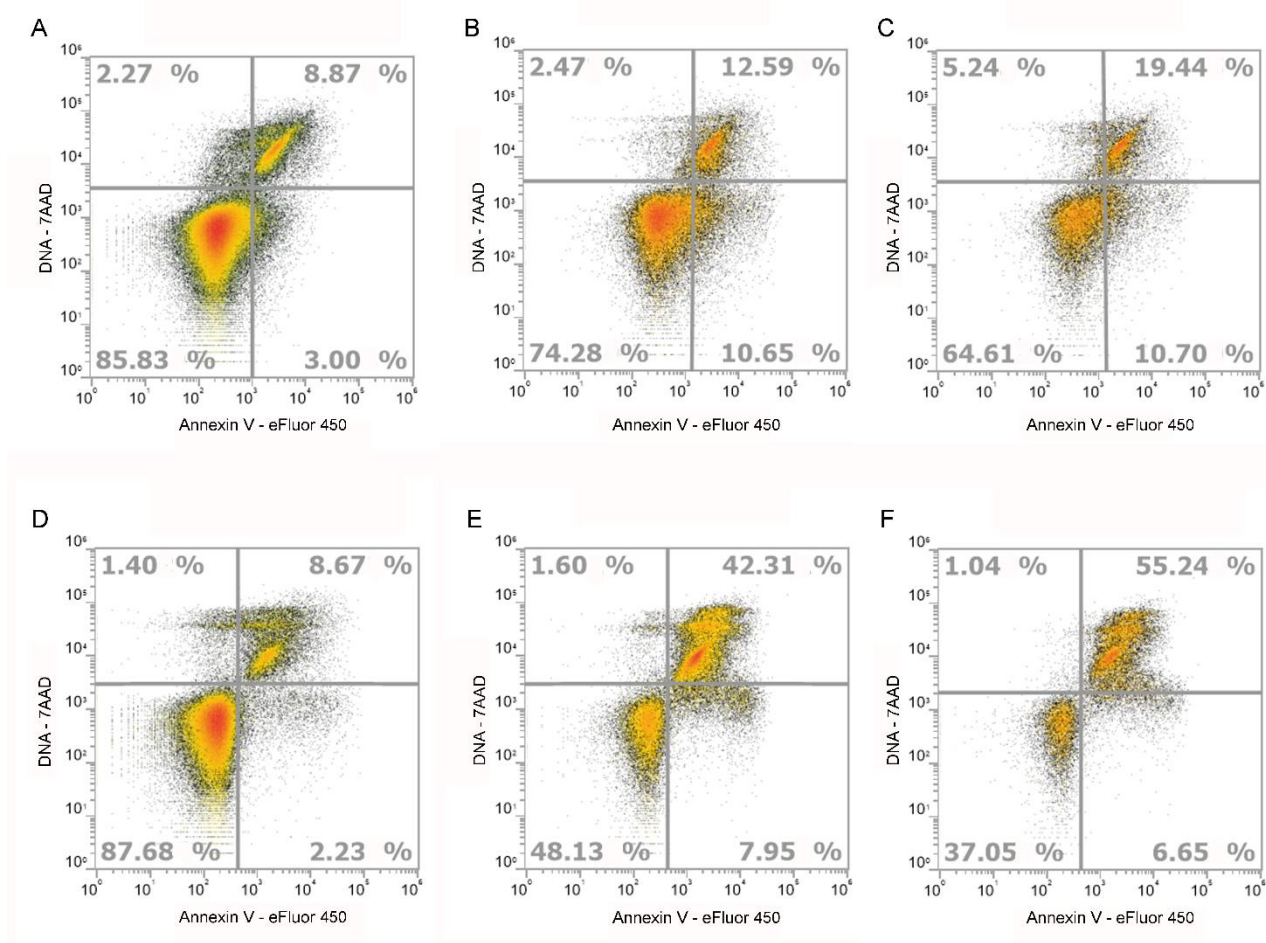

**Figure S3.** Annexin V/7AAD analysis representative FC plots. Panels A and D: RAJI and MOLT-4 untreated control (UT), respectively. Panels B and E: RAJI and MOLT-4 treated with 0.15 U/ml T-CAN, respectively. Panels C and F: RAJI and MOLT-4 treated with 0.15 U/ml Kidrolase, respectively. Cells positive for 7AAD and Annexin v (bottom right, top left and right quadrants) were considered dead. Percentage of total events for

each quadrant are reported in grey.

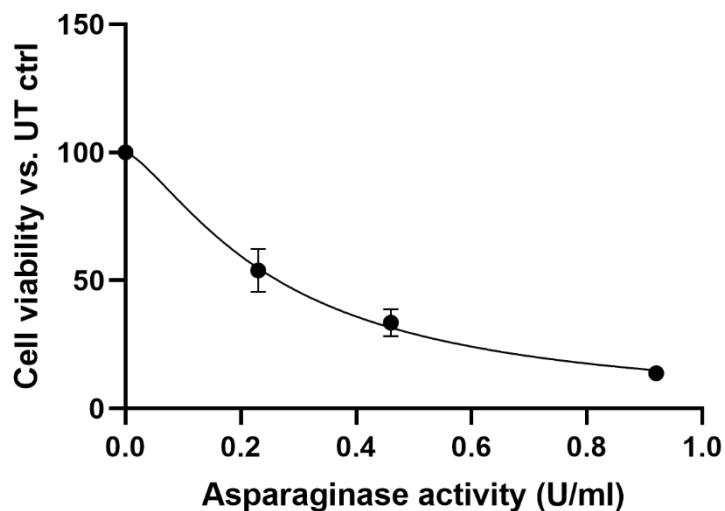

**Figure S4.** Viability of MOLT-4 cells treated with sdASNase, expressed as percentage versus untreated control (Trypan blue).

#### Blast IMGT database

##### VH gene

>20975 MK540646 Homo sapiens IGHV3-20\*04 VH

Length = 98

Score = 120 bits (301), Expect = 2e-29

Identities = 65/97 (67%), Positives = 77/97 (79%), Gaps = 3/97 (3%)

Query: 3 QVQLVESGGGTVPAGGSLRLSCAAS **TKTDT**YDMSWYRRAPGKGRDFVSGID-NDGTTY 61  
 +VQLVESGGG V GGSRLRLSCAAS T D Y MSW R+APGKG ++VSGI+ N G+T Y  
 Sbjct: 1 EVQLVESGGGVVRPGGSLRLSCAASGFTFDDYGMSWVRQAPGKGLEWVSGINWNGGSTGY 60

Query: 62 VDSVAGRFTISQGNAKTA-YLQMDSLKPDNDTAMYIC 97

DSV GRFTIS+ NAK + YLQM+SL+ + DTA+YYC

Sbjct: 61 ADSVKGRFTISRDNKNSLYLQMNSLRAE-DTALYYC 96

**Figure S5.** Alignment of sdASNase to IMGT database best match for Homo sapiens V genes.

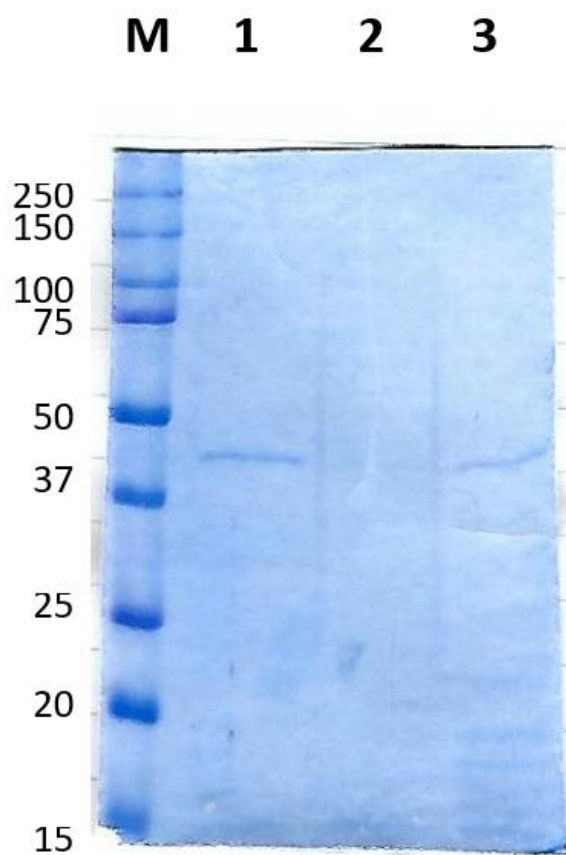

**Figure S6.** M: Marker (Precision Plus Protein standard, BioRad); lane 1: peak fraction at 250 mM imidazole elution, lane 2: flow-through; lane 3: preloading. Lane 2 and 3 were removed for the panel in Figure 4.
